# Supplementary material for: Pan-Cancer Analysis of Immune Complement Signature C3/C5/C3AR1/C5AR1 in Association with Tumor Immune Evasion and Therapy Resistance
Source: MDPI journal article supplement (doi:10.3390/cancers13164124), 2021-08-16
Supplement: s1 [file s1]

# Supplementary Materials: Pan-Cancer Analysis of Immune Complement Signature C3/C5/C3AR1/C5AR1 in Association with Tumor Immune Evasion and Therapy Resistance

Bashir Lawal, Sung-Hui Tseng, Janet Olayemi Olugbodi, Sitthichai Iamsaard, Omotayo B. Ilesanmi, Mohamed H. Mahmoud, Sahar H. Ahmed, Gaber El-Saber Batiha and Alexander T.H. Wu

**Table S1.** Survival differences between cohorts expressing high vs. low gene expression levels of C3, C5, C5AR1, and C3AR1 across various cancer types.

| cancertype | symbol | sur_type | hr_categorical(H/L) | coxp_categorical | logrankp | higher_risk_of_death |
|------------|--------|----------|---------------------|------------------|----------|----------------------|
| ACC        | C3     | OS       | 0.210134            | 0.000969         | 0.000294 | Lower expr.          |
| ACC        | C3     | PFS      | 0.218855            | 1.77E-05         | 3.39E-06 | Lower expr.          |
| COAD       | C3     | PFS      | 1.786286            | 0.007853         | 0.007086 | Higher expr.         |
| GBM        | C3     | PFS      | 1.409067            | 0.041031         | 0.040621 | Higher expr.         |
| KIRC       | C3     | OS       | 1.472483            | 0.014077         | 0.013514 | Higher expr.         |
| KIRC       | C3     | PFS      | 1.450014            | 0.017903         | 0.017287 | Higher expr.         |
| LGG        | C3     | OS       | 2.141746            | 0.001053         | 0.000798 | Higher expr.         |
| LGG        | C3     | PFS      | 2.303414            | 3.05E-05         | 1.81E-05 | Higher expr.         |
| LUSC       | C3     | OS       | 1.471853            | 0.023173         | 0.022331 | Higher expr.         |
| LUSC       | C3     | PFS      | 1.451787            | 0.027011         | 0.026143 | Higher expr.         |
| MESO       | C3     | OS       | 0.327308            | 0.044879         | 0.036307 | Lower expr.          |
| SKCM       | C3     | OS       | 0.718723            | 0.04137          | 0.040435 | Lower expr.          |
| ACC        | C3AR1  | PFS      | 0.486171            | 0.025741         | 0.023173 | Lower expr.          |
| GBM        | C3AR1  | PFS      | 1.451324            | 0.026616         | 0.025507 | Higher expr.         |
| LGG        | C3AR1  | OS       | 1.641731            | 0.029289         | 0.027984 | Higher expr.         |
| LGG        | C3AR1  | PFS      | 1.674732            | 0.008073         | 0.007493 | Higher expr.         |
| SKCM       | C3AR1  | OS       | 0.607509            | 0.002085         | 0.001874 | Lower expr.          |
| UVM        | C3AR1  | OS       | 6.413163            | 0.027837         | 0.014368 | Higher expr.         |
| COAD       | C5     | OS       | 1.779796            | 0.038872         | 0.036289 | Higher expr.         |
| COAD       | C5     | PFS      | 1.53912             | 0.048143         | 0.046684 | Higher expr.         |
| KICH       | C5     | PFS      | 4.73855             | 0.049399         | 0.030221 | Higher expr.         |
| LIHC       | C5     | PFS      | 0.625433            | 0.0187           | 0.017847 | Lower expr.          |
| SKCM       | C5     | OS       | 0.679179            | 0.017158         | 0.016484 | Lower expr.          |
| STAD       | C5     | PFS      | 1.543903            | 0.038934         | 0.03742  | Higher expr.         |
| UCEC       | C5     | OS       | 0.2765              | 0.02812          | 0.018924 | Lower expr.          |
| UVM        | C5     | OS       | 5.310533            | 0.03511          | 0.018477 | Higher expr.         |
| DLBC       | C5AR1  | OS       | 3.28E-10            | 0.999175         | 0.011569 | Lower expr.          |
| DLBC       | C5AR1  | PFS      | 3.68E-10            | 0.9989           | 0.001249 | Lower expr.          |
| THCA       | C5AR1  | PFS      | 2.314689            | 0.017261         | 0.014313 | Higher expr.         |

**Table S2.** C3, C5, C5AR1, and C3AR1 expression correlation with infiltration levels of tumor associated macrophages (M2-TAM) across various cancer types.

| cancer                    | C5_M2-TAM |          | C3_M2-TAM |          | C3AR1_M2-TAM |          | C5AR1_M2-TAM |          |
|---------------------------|-----------|----------|-----------|----------|--------------|----------|--------------|----------|
|                           | rho       | p        | rho       | p        | rho          | p        | rho          | p        |
| ACC (n = 79)              | −0.20737  | 0.078342 | −0.25435  | 0.029895 | −0.20893     | 0.076073 | −0.40531     | 0.000375 |
| BLCA (n = 408)            | −0.12642  | 0.015239 | −0.34064  | 1.89E−11 | −0.57176     | 2.50E−33 | −0.49657     | 2.62E−24 |
| BRCA (n = 1100)           | 0.12805   | 5.15E−05 | −0.33488  | 1.79E−27 | −0.51148     | 2.30E−67 | −0.52509     | 1.57E−71 |
| BRCA-Basal (n = 191)      | −0.04429  | 0.561739 | −0.45882  | 1.93E−10 | −0.60033     | 2.04E−18 | −0.47978     | 2.11E−11 |
| BRCA-Her2 (n = 82)        | −0.08691  | 0.467878 | −0.39819  | 0.000532 | −0.53327     | 1.41E−06 | −0.44266     | 9.88E−05 |
| BRCA-LumA (n = 568)       | 0.035416  | 0.421636 | −0.3276   | 2.13E−14 | −0.54407     | 3.60E−41 | −0.53811     | 3.81E−40 |
| BRCA-LumB (n = 219)       | −0.0757   | 0.296669 | −0.30266  | 1.98E−05 | −0.51239     | 3.03E−14 | −0.46833     | 7.38E−12 |
| CESC (n = 306)            | 0.130735  | 0.029602 | −0.20951  | 0.000448 | −0.45862     | 8.19E−16 | −0.17874     | 0.002832 |
| CHOL (n = 36)             | −0.15311  | 0.379878 | −0.00363  | 0.983471 | −0.62164     | 6.72E−05 | −0.51199     | 0.001667 |
| COAD (n = 458)            | 0.007524  | 0.87986  | −0.42801  | 1.62E−19 | −0.64343     | 8.02E−49 | −0.65597     | 2.64E−51 |
| DLBC (n = 48)             | 0.069317  | 0.666733 | 0.273336  | 0.083777 | −0.74902     | 1.77E−08 | −0.6009      | 3.26E−05 |
| ESCA (n = 185)            | 0.050521  | 0.500613 | −0.16806  | 0.024129 | −0.41869     | 4.94E−09 | −0.42214     | 3.58E−09 |
| GBM (n = 153)             | −0.04399  | 0.609772 | −0.57486  | 2.04E−13 | −0.52274     | 5.66E−11 | −0.57502     | 2.00E−13 |
| HNSC (n = 522)            | 0.089132  | 0.04816  | −0.17299  | 0.000115 | −0.48535     | 1.93E−30 | −0.37862     | 3.23E−18 |
| HNSC-HPV− (n = 422)       | 0.083081  | 0.097055 | −0.16531  | 0.000904 | −0.50556     | 2.43E−27 | −0.40036     | 7.87E−17 |
| HNSC-HPV+ (n = 98)        | 0.066118  | 0.538148 | −0.21394  | 0.044104 | −0.41025     | 6.53E−05 | −0.27044     | 0.010372 |
| KICH (n = 66)             | −0.04441  | 0.72539  | −0.50673  | 1.65E−05 | −0.61813     | 4.11E−08 | −0.63053     | 1.81E−08 |
| KIRC (n = 533)            | −0.05415  | 0.245889 | −0.33954  | 6.67E−14 | −0.48198     | 3.43E−28 | −0.52438     | 6.30E−34 |
| KIRP (n = 290)            | −0.17604  | 0.004567 | −0.6061   | 2.88E−27 | −0.4764      | 5.06E−16 | −0.60245     | 7.06E−27 |
| LGG (n = 516)             | 0.028738  | 0.530793 | −0.62694  | 1.43E−53 | −0.62771     | 9.75E−54 | −0.7021      | 3.29E−72 |
| LIHC (n = 371)            | −0.28304  | 8.90E−08 | −0.20201  | 0.000158 | −0.41958     | 3.82E−16 | −0.55967     | 7.89E−30 |
| LUAD (n = 515)            | 0.126206  | 0.005011 | −0.00918  | 0.838828 | −0.51677     | 5.20E−35 | −0.47743     | 1.96E−29 |
| LUSC (n = 501)            | −0.06113  | 0.182549 | −0.3478   | 5.21E−15 | −0.56383     | 2.23E−41 | −0.50097     | 1.13E−31 |
| MESO (n = 87)             | 0.170799  | 0.118081 | −0.02725  | 0.804497 | −0.40877     | 0.000103 | −0.48979     | 1.96E−06 |
| OV (n = 303)              | 0.088975  | 0.161601 | −0.38486  | 3.25E−10 | −0.53945     | 3.34E−20 | −0.50334     | 2.13E−17 |
| PAAD (n = 179)            | 0.08495   | 0.269281 | −0.17884  | 0.019263 | −0.39346     | 1.02E−07 | −0.52139     | 2.64E−13 |
| PCPG (n = 181)            | −0.02081  | 0.789517 | −0.20608  | 0.007541 | −0.46094     | 3.65E−10 | −0.73199     | 2.68E−29 |
| PRAD (n = 498)            | −0.14594  | 0.002848 | −0.532    | 9.00E−32 | −0.4585      | 5.15E−23 | −0.61835     | 3.05E−45 |
| READ (n = 166)            | −0.23106  | 0.006206 | −0.45779  | 1.46E−08 | −0.68833     | 7.77E−21 | −0.64912     | 5.51E−18 |
| SARC (n = 260)            | 0.030234  | 0.638391 | −0.432    | 1.63E−12 | −0.55655     | 3.02E−21 | −0.47842     | 2.32E−15 |
| SKCM (n = 471)            | −0.04167  | 0.374188 | −0.29916  | 6.67E−11 | −0.58124     | 1.19E−42 | −0.41271     | 3.19E−20 |
| SKCM-Metastasis (n = 368) | −0.02465  | 0.643896 | −0.21046  | 6.59E−05 | −0.54261     | 1.71E−28 | −0.34305     | 3.27E−11 |
| SKCM-Primary (n = 103)    | 0.015662  | 0.875843 | −0.26653  | 0.006773 | −0.54134     | 4.24E−09 | −0.41739     | 1.27E−05 |
| STAD (n = 415)            | −0.05545  | 0.281549 | −0.24451  | 1.45E−06 | −0.53677     | 1.15E−29 | −0.53973     | 4.90E−30 |
| TGCT (n = 150)            | 0.017833  | 0.830248 | −0.27408  | 0.000782 | −0.68119     | 2.22E−21 | −0.63972     | 2.74E−18 |
| THCA (n = 509)            | 0.013348  | 0.768665 | −0.65686  | 1.40E−61 | −0.68059     | 1.17E−67 | −0.7306      | 1.46E−82 |
| THYM (n = 120)            | −0.56268  | 5.96E−11 | −0.27292  | 0.003167 | −0.53643     | 6.45E−10 | −0.62335     | 1.01E−13 |
| UCEC (n = 545)            | 0.186623  | 0.001332 | −0.40425  | 6.04E−13 | −0.46819     | 2.28E−17 | −0.35834     | 2.64E−10 |
| UCS (n = 57)              | 0.217094  | 0.118414 | −0.57703  | 6.10E−06 | −0.37941     | 0.00508  | −0.5003      | 0.000136 |
| UVM (n = 80)              | −0.10236  | 0.375706 | −0.57139  | 5.73E−08 | −0.56967     | 6.41E−08 | −0.46352     | 2.18E−05 |

**Table S3.** Distribution of effective mutation and non-effective mutations of C3, C5, C5AR1, and C3AR1 across various cancer types.

| cancertype | symbol | EffectiveMut | NonEffectiveMut | sample_size | percentage | entrez |
|------------|--------|--------------|-----------------|-------------|------------|--------|
| ACC        | C3     | 0            | 1               | 92          | 0          | 718    |
| ACC        | C3AR1  | 1            | 0               | 92          | 1.086957   | 719    |
| BLCA       | C3     | 17           | 9               | 411         | 4.136253   | 718    |
| BLCA       | C3AR1  | 4            | 4               | 411         | 0.973236   | 719    |
| BLCA       | C5     | 9            | 2               | 411         | 2.189781   | 727    |
| BLCA       | C5AR1  | 1            | 7               | 411         | 0.243309   | 728    |
| BRCA       | C3     | 11           | 4               | 1026        | 1.072125   | 718    |
| BRCA       | C3AR1  | 2            | 2               | 1026        | 0.194932   | 719    |
| BRCA       | C5     | 11           | 7               | 1026        | 1.072125   | 727    |
| BRCA       | C5AR1  | 5            | 0               | 1026        | 0.487329   | 728    |
| CESC       | C3     | 8            | 4               | 291         | 2.749141   | 718    |
| CESC       | C3AR1  | 1            | 1               | 291         | 0.343643   | 719    |
| CESC       | C5     | 2            | 2               | 291         | 0.687285   | 727    |
| CESC       | C5AR1  | 4            | 1               | 291         | 1.37457    | 728    |
| CHOL       | C3     | 2            | 0               | 36          | 5.555556   | 718    |
| COAD       | C3     | 23           | 16              | 407         | 5.651106   | 718    |
| COAD       | C3AR1  | 8            | 5               | 407         | 1.965602   | 719    |
| COAD       | C5     | 19           | 6               | 407         | 4.668305   | 727    |
| COAD       | C5AR1  | 6            | 3               | 407         | 1.474201   | 728    |
| DLBC       | C3     | 1            | 1               | 37          | 2.702703   | 718    |
| ESCA       | C3     | 6            | 2               | 185         | 3.243243   | 718    |
| ESCA       | C3AR1  | 2            | 0               | 185         | 1.081081   | 719    |
| ESCA       | C5     | 1            | 0               | 185         | 0.540541   | 727    |
| ESCA       | C5AR1  | 1            | 1               | 185         | 0.540541   | 728    |
| GBM        | C3     | 11           | 5               | 403         | 2.729529   | 718    |
| GBM        | C3AR1  | 2            | 2               | 403         | 0.496278   | 719    |
| GBM        | C5     | 2            | 2               | 403         | 0.496278   | 727    |
| GBM        | C5AR1  | 2            | 1               | 403         | 0.496278   | 728    |
| HNSC       | C3     | 14           | 4               | 509         | 2.750491   | 718    |
| HNSC       | C3AR1  | 5            | 5               | 509         | 0.982318   | 719    |
| HNSC       | C5     | 9            | 2               | 509         | 1.768173   | 727    |
| HNSC       | C5AR1  | 1            | 2               | 509         | 0.196464   | 728    |
| KICH       | C5     | 1            | 0               | 66          | 1.515152   | 727    |
| KIRC       | C3     | 4            | 1               | 370         | 1.081081   | 718    |
| KIRC       | C3AR1  | 1            | 1               | 370         | 0.27027    | 719    |
| KIRC       | C5     | 2            | 0               | 370         | 0.540541   | 727    |
| KIRC       | C5AR1  | 1            | 0               | 370         | 0.27027    | 728    |
| KIRP       | C3     | 1            | 0               | 282         | 0.35461    | 718    |
| KIRP       | C3AR1  | 3            | 0               | 282         | 1.06383    | 719    |
| KIRP       | C5     | 1            | 2               | 282         | 0.35461    | 727    |
| LAML       | C3     | 1            | 0               | 85          | 1.176471   | 718    |
| LGG        | C3     | 9            | 4               | 526         | 1.711027   | 718    |
| LGG        | C3AR1  | 1            | 0               | 526         | 0.190114   | 719    |
| LGG        | C5     | 3            | 2               | 526         | 0.570342   | 727    |
| LGG        | C5AR1  | 0            | 1               | 526         | 0          | 728    |
| LIHC       | C3     | 12           | 7               | 365         | 3.287671   | 718    |
| LIHC       | C3AR1  | 1            | 0               | 365         | 0.273973   | 719    |
| LIHC       | C5     | 6            | 1               | 365         | 1.643836   | 727    |

|      |       |    |    |     |          |     |
|------|-------|----|----|-----|----------|-----|
| LUAD | C3    | 15 | 4  | 567 | 2.645503 | 718 |
| LUAD | C3AR1 | 11 | 5  | 567 | 1.940035 | 719 |
| LUAD | C5    | 8  | 3  | 567 | 1.410935 | 727 |
| LUAD | C5AR1 | 7  | 2  | 567 | 1.234568 | 728 |
| LUSC | C3    | 23 | 6  | 485 | 4.742268 | 718 |
| LUSC | C3AR1 | 10 | 1  | 485 | 2.061856 | 719 |
| LUSC | C5    | 12 | 2  | 485 | 2.474227 | 727 |
| LUSC | C5AR1 | 6  | 3  | 485 | 1.237113 | 728 |
| MESO | C3    | 0  | 1  | 82  | 0        | 718 |
| OV   | C3    | 6  | 0  | 412 | 1.456311 | 718 |
| OV   | C3AR1 | 3  | 2  | 412 | 0.728155 | 719 |
| OV   | C5    | 6  | 4  | 412 | 1.456311 | 727 |
| OV   | C5AR1 | 3  | 0  | 412 | 0.728155 | 728 |
| PAAD | C3    | 3  | 1  | 178 | 1.685393 | 718 |
| PAAD | C3AR1 | 1  | 0  | 178 | 0.561798 | 719 |
| PAAD | C5    | 1  | 1  | 178 | 0.561798 | 727 |
| PAAD | C5AR1 | 1  | 1  | 178 | 0.561798 | 728 |
| PCPG | C5    | 1  | 0  | 184 | 0.543478 | 727 |
| PRAD | C3    | 3  | 2  | 498 | 0.60241  | 718 |
| PRAD | C3AR1 | 2  | 0  | 498 | 0.401606 | 719 |
| PRAD | C5    | 2  | 3  | 498 | 0.401606 | 727 |
| READ | C3    | 3  | 3  | 149 | 2.013423 | 718 |
| READ | C3AR1 | 6  | 1  | 149 | 4.026846 | 719 |
| READ | C5    | 4  | 1  | 149 | 2.684564 | 727 |
| READ | C5AR1 | 2  | 0  | 149 | 1.342282 | 728 |
| SARC | C3    | 4  | 1  | 239 | 1.67364  | 718 |
| SARC | C3AR1 | 1  | 1  | 239 | 0.41841  | 719 |
| SARC | C5    | 3  | 0  | 239 | 1.25523  | 727 |
| SKCM | C3    | 63 | 45 | 468 | 13.46154 | 718 |
| SKCM | C3AR1 | 14 | 3  | 468 | 2.991453 | 719 |
| SKCM | C5    | 42 | 18 | 468 | 8.974359 | 727 |
| SKCM | C5AR1 | 16 | 21 | 468 | 3.418803 | 728 |
| STAD | C3    | 31 | 8  | 439 | 7.061503 | 718 |
| STAD | C3AR1 | 9  | 3  | 439 | 2.050114 | 719 |
| STAD | C5    | 13 | 9  | 439 | 2.961276 | 727 |
| STAD | C5AR1 | 5  | 1  | 439 | 1.138952 | 728 |
| TGCT | C5    | 1  | 0  | 151 | 0.662252 | 727 |
| THCA | C3    | 1  | 1  | 500 | 0.2      | 718 |
| UCEC | C3    | 65 | 27 | 531 | 12.24105 | 718 |
| UCEC | C3AR1 | 24 | 10 | 531 | 4.519774 | 719 |
| UCEC | C5    | 45 | 24 | 531 | 8.474576 | 727 |
| UCEC | C5AR1 | 10 | 6  | 531 | 1.883239 | 728 |
| UCS  | C3    | 0  | 1  | 57  | 0        | 718 |
| UCS  | C3AR1 | 1  | 0  | 57  | 1.754386 | 719 |
| UVM  | C3    | 2  | 0  | 80  | 2.5      | 718 |

**Table S4.** Gene alterations associated with C3/C5/C3AR1/C5AR1 SNV.

| C5        | Cytoband        | Altered group | Unaltered group | Log Ratio | p-Value   | q-Value   | Enriched in   |
|-----------|-----------------|---------------|-----------------|-----------|-----------|-----------|---------------|
| CDK5RAP2  | 9q33.2          | 104 (39.69%)  | 194 (1.81%)     | 4.45      | 2.43E-98  | 5.83E-94  | Altered group |
| CNTRL     | 9q33.2          | 102 (38.93%)  | 198 (1.85%)     | 4.39      | 6.59E-95  | 7.92E-91  | Altered group |
| PSMD5     | 9q33.2          | 67 (25.57%)   | 43 (0.40%)      | 5.99      | 8.91E-83  | 6.48E-79  | Altered group |
| STRBP     | 9q33.3          | 77 (29.39%)   | 90 (0.84%)      | 5.13      | 1.08E-82  | 6.48E-79  | Altered group |
| CUTALP    | 9q33.2          | 49 (18.70%)   | 0 (0.00%)       | >10       | 3.24E-82  | 1.56E-78  | Altered group |
| PAPPA     | 9q33.1          | 102 (38.93%)  | 309 (2.89%)     | 3.75      | 3.64E-79  | 1.46E-75  | Altered group |
| PHF19     | 9q33.2          | 66 (25.19%)   | 54 (0.50%)      | 5.64      | 2.99E-77  | 1.03E-73  | Altered group |
| RAB14     | 9q33.2          | 60 (22.90%)   | 32 (0.30%)      | 6.26      | 1.24E-76  | 3.72E-73  | Altered group |
| B3GNT10   | 9q33.2          | 47 (17.94%)   | 2 (0.02%)       | 9.91      | 9.48E-76  | 2.53E-72  | Altered group |
| RABGAP1   | 9q33.2-q33.3    | 81 (30.92%)   | 150 (1.40%)     | 4.46      | 2.56E-75  | 6.15E-72  | Altered group |
| ECPAS     | 9q31.3          | 83 (31.68%)   | 171 (1.60%)     | 4.31      | 2.53E-74  | 5.53E-71  | Altered group |
| C3        | Cytoband        | Altered group | Unaltered group | Log Ratio | p-Value   | q-Value   | Enriched in   |
| INSR      | 19p13.2         | 142 (33.81%)  | 176 (1.67%)     | 4.34      | #####     | #####     | Altered group |
| SH2D3A    | 19p13.3         | 105 (25.00%)  | 59 (0.56%)      | 5.48      | #####     | #####     | Altered group |
| GPR108    | 19p13.3         | 98 (23.33%)   | 47 (0.45%)      | 5.71      | #####     | #####     | Altered group |
| ZNF557    | 19p13.2         | 106 (25.24%)  | 87 (0.83%)      | 4.93      | #####     | 7.69E-98  | Altered group |
| TNFSF14   | 19p13.3         | 93 (22.14%)   | 46 (0.44%)      | 5.66      | #####     | 7.87E-97  | Altered group |
| TRIP10    | 19p13.3         | 99 (23.57%)   | 67 (0.64%)      | 5.21      | 1.11E-99  | 4.46E-96  | Altered group |
| ACSBG2    | 19p13.3         | 107 (25.48%)  | 100 (0.95%)     | 4.75      | 9.12E-99  | 3.13E-95  | Altered group |
| VAV1      | 19p13.3         | 118 (28.10%)  | 155 (1.47%)     | 4.26      | 1.21E-97  | 3.63E-94  | Altered group |
| ADGRE1    | 19p13.3-p13.2   | 120 (28.57%)  | 173 (1.64%)     | 4.12      | 5.88E-96  | 1.57E-92  | Altered group |
| PNPLA6    | 19p13.2         | 121 (28.81%)  | 179 (1.70%)     | 4.08      | 7.77E-96  | 1.87E-92  | Altered group |
| RFX2      | 19p13.3         | 102 (24.29%)  | 91 (0.86%)      | 4.81      | 2.84E-95  | 6.20E-92  | Altered group |
| C3AR1     | Cytoband        | Altered group | Unaltered group | Log Ratio | p-Value   | q-Value   | Enriched in   |
| POU5F1P3  | 12p13.31        | 149 (57.53%)  | 4 (0.04%)       | >10       | 6.28E-259 | 1.51E-254 | Altered group |
| FAM66C    | 12p13.31        | 148 (57.14%)  | 12 (0.11%)      | 8.99      | 9.89E-247 | 1.19E-242 | Altered group |
| FAM86FP   | 12p13.31        | 147 (56.76%)  | 12 (0.11%)      | 8.98      | 8.82E-245 | 5.30E-241 | Altered group |
| LINC00937 | 12p13.31        | 147 (56.76%)  | 12 (0.11%)      | 8.98      | 8.82E-245 | 5.30E-241 | Altered group |
| CLEC4A    | 12p13.31        | 161 (62.16%)  | 47 (0.44%)      | 7.14      | 1.59E-243 | 7.63E-240 | Altered group |
| FOXJ2     | 12p13.31        | 167 (64.48%)  | 72 (0.67%)      | 6.58      | 9.45E-241 | 3.78E-237 | Altered group |
| NECAP1    | 12p13.31        | 155 (59.85%)  | 42 (0.39%)      | 7.25      | 2.86E-235 | 9.82E-232 | Altered group |
| NANOGNB   | 12p13.31        | 144 (55.60%)  | 22 (0.21%)      | 8.08      | 2.74E-229 | 8.21E-226 | Altered group |
| ZNF705A   | 12p13.31        | 159 (61.39%)  | 72 (0.67%)      | 6.51      | 1.19E-225 | 3.18E-222 | Altered group |
| SLC2A3    | 12p13.31        | 162 (62.55%)  | 100 (0.93%)     | 6.06      | 1.67E-218 | 4.01E-215 | Altered group |
| NANOG     | 12p13.31        | 150 (57.92%)  | 58 (0.54%)      | 6.74      | 3.03E-216 | 6.62E-213 | Altered group |
| C5AR1     | Cytoband        | Altered group | Unaltered group | Log Ratio | p-Value   | q-Value   | Enriched in   |
| INAFM1    | 19q13.32        | 45 (38.79%)   | 4 (0.04%)       | >10       | 1.46E-88  | 3.50E-84  | Altered group |
| NAPA-AS1  | 19q13.32-q13.33 | 41 (35.34%)   | 6 (0.06%)       | 9.32      | 3.55E-78  | 4.26E-74  | Altered group |
| C5AR2     | 19q13.32        | 51 (43.97%)   | 53 (0.49%)      | 6.49      | 4.90E-77  | 3.93E-73  | Altered group |
| TMEM160   | 19q13.32        | 43 (37.07%)   | 15 (0.14%)      | 8.07      | 4.32E-76  | 2.59E-72  | Altered group |
| CCDC9     | 19q13.32        | 52 (44.83%)   | 73 (0.67%)      | 6.06      | 8.79E-74  | 4.22E-70  | Altered group |
| SAE1      | 19q13.32        | 51 (43.97%)   | 69 (0.64%)      | 6.11      | 7.24E-73  | 2.90E-69  | Altered group |
| NAPA      | 19q13.32-q13.33 | 48 (41.38%)   | 50 (0.46%)      | 6.49      | 3.42E-72  | 1.17E-68  | Altered group |
| BBC3      | 19q13.32        | 45 (38.79%)   | 34 (0.31%)      | 6.95      | 1.44E-71  | 4.32E-68  | Altered group |
| SNORD23   | 19q13.33        | 39 (33.62%)   | 16 (0.15%)      | 7.83      | 1.87E-67  | 4.98E-64  | Altered group |
| NPAS1     | 19q13.32        | 46 (39.66%)   | 77 (0.71%)      | 5.8       | 4.29E-62  | 1.03E-58  | Altered group |

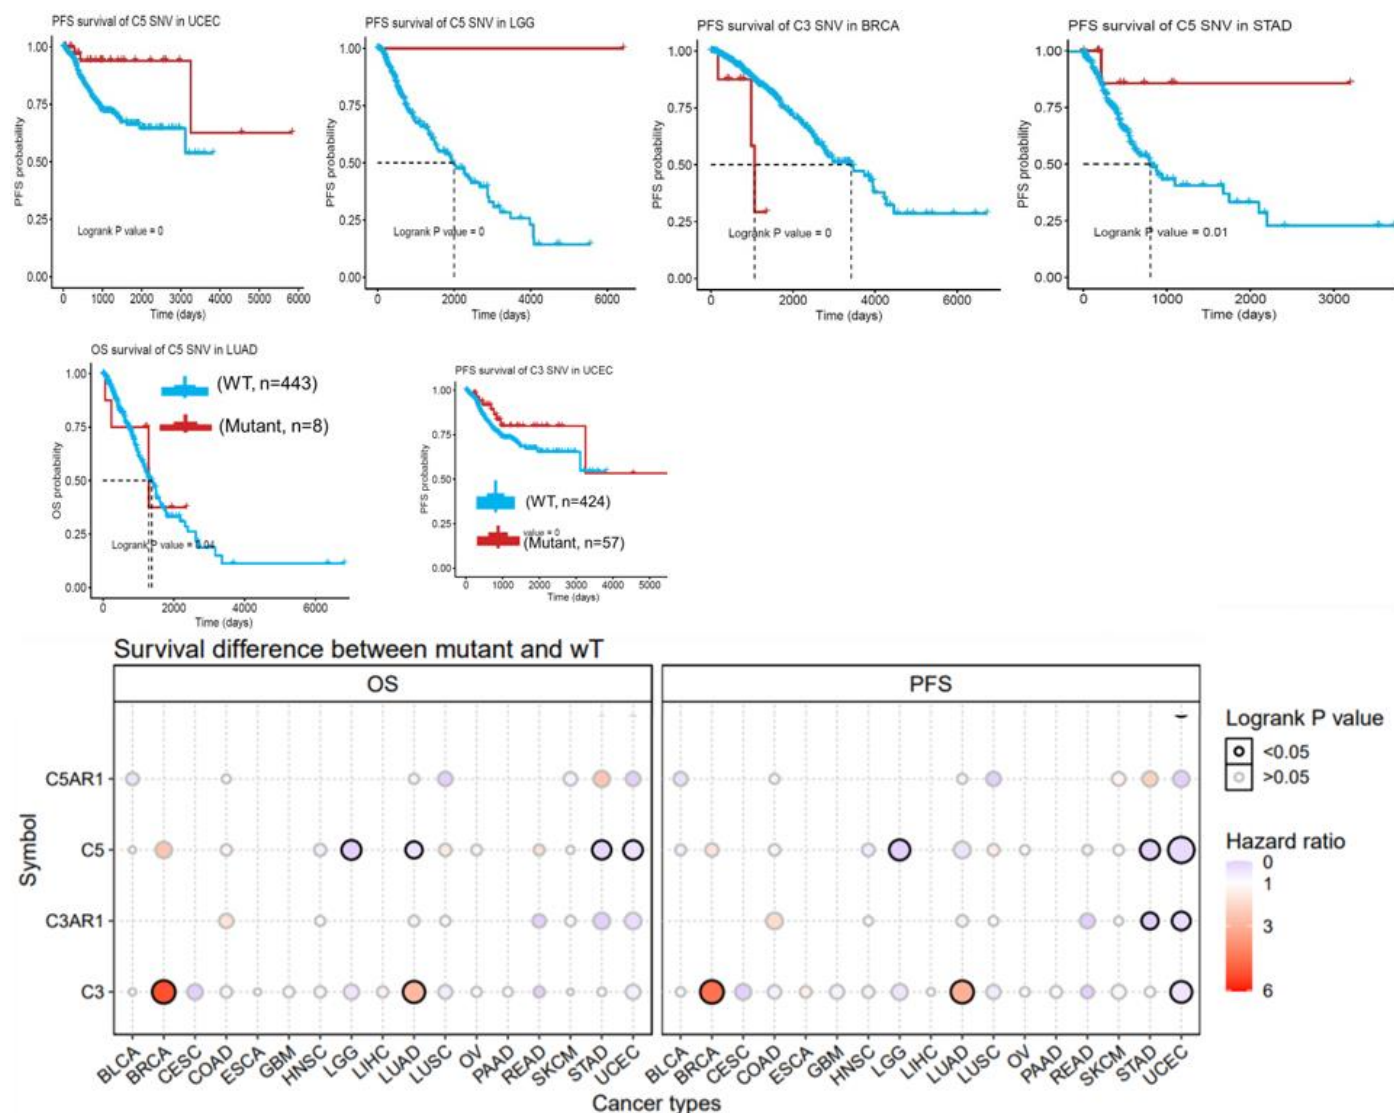

**Figure S1.** Kaplan Meir plot of the progression-free survival of cohort with mutant or wild type C5, C3, C3AR1, and C5AR1.

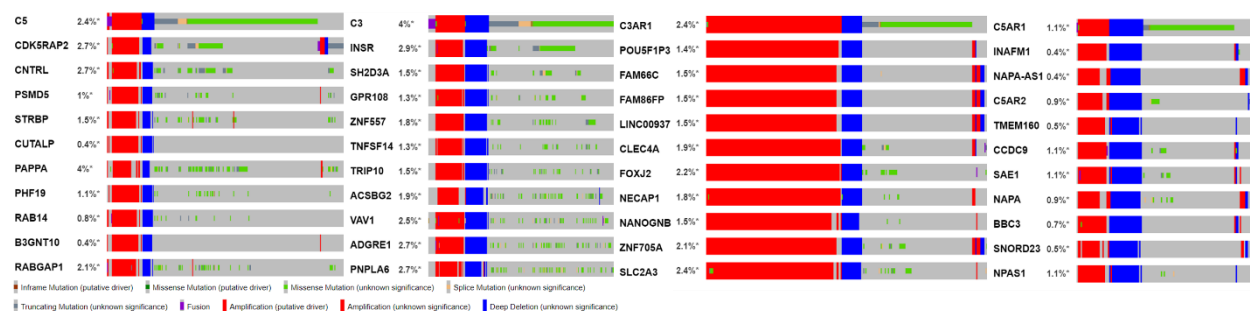

**Figure S2.** Heatmap showing C3, C5, C3AR1, and C5AR1 mutation co-occurrence pattern with other oncogenic proteins.

**File S1.** The individual patient and sample IDs of each TCGA cancer type.

**File S2.** The raw file of the immune infiltration\_estimation for all TCGA tumor types used in this study.

**File S3.** ImmuCellAI-based correlation between the C3, C5, C3AR1, and C5AR1 expression levels and the abundance of the immune cells across the TCGA cancer types.

**Files S1–S3.** are provided separately, attached as Excel files.
